# Supplementary material for: EHO-85, Novel Amorphous Antioxidant Hydrogel, Containing Olea europaea Leaf Extract—Rheological Properties, and Superiority over a Standard Hydrogel in Accelerating Early Wound Healing: A Randomized Controlled Trial
Source: MDPI journal article supplement (doi:10.3390/pharmaceutics15071925), 2023-07-11
Supplement: s1 [file s1]

Superiority of EHO-85, a novel amorphous antioxidant hydrogel, containing an extract of *Olea europaea* leaves, over a standard hydrogel in accelerating early wound healing. A randomized controlled trial.

## **SUPPORTING INFORMATION**

### **List of figures and tables**

- Figure S1. Flow curves, showing the viscosity as a function of shear rate (two replicates), for the five hydrogel samples (EHO-85, Intrasite, Nu-gel, VariHesive and Purilon)
- Figure S2. Visual aspect of the different gel samples (EHO-85, Purilon, VariHesive, Intrasite and Nu-gel)
- Figure S3. Strain sweep of gel samples, showing the storage (elastic) modulus  $G'$  and the loss (viscous) modulus  $G''$  as a function of the strain.
- Figure S4. Frequency sweep of gel samples, showing the storage (elastic)  $G'$  and the loss (viscous) modulus  $G''$  as a function of frequency.
- Table S1. Baseline characteristics of patients.
- Table S2. Description of Ulcers and Prior Treatments.
- Table S3. List of collaborating nurses (sub-investigators) by centers

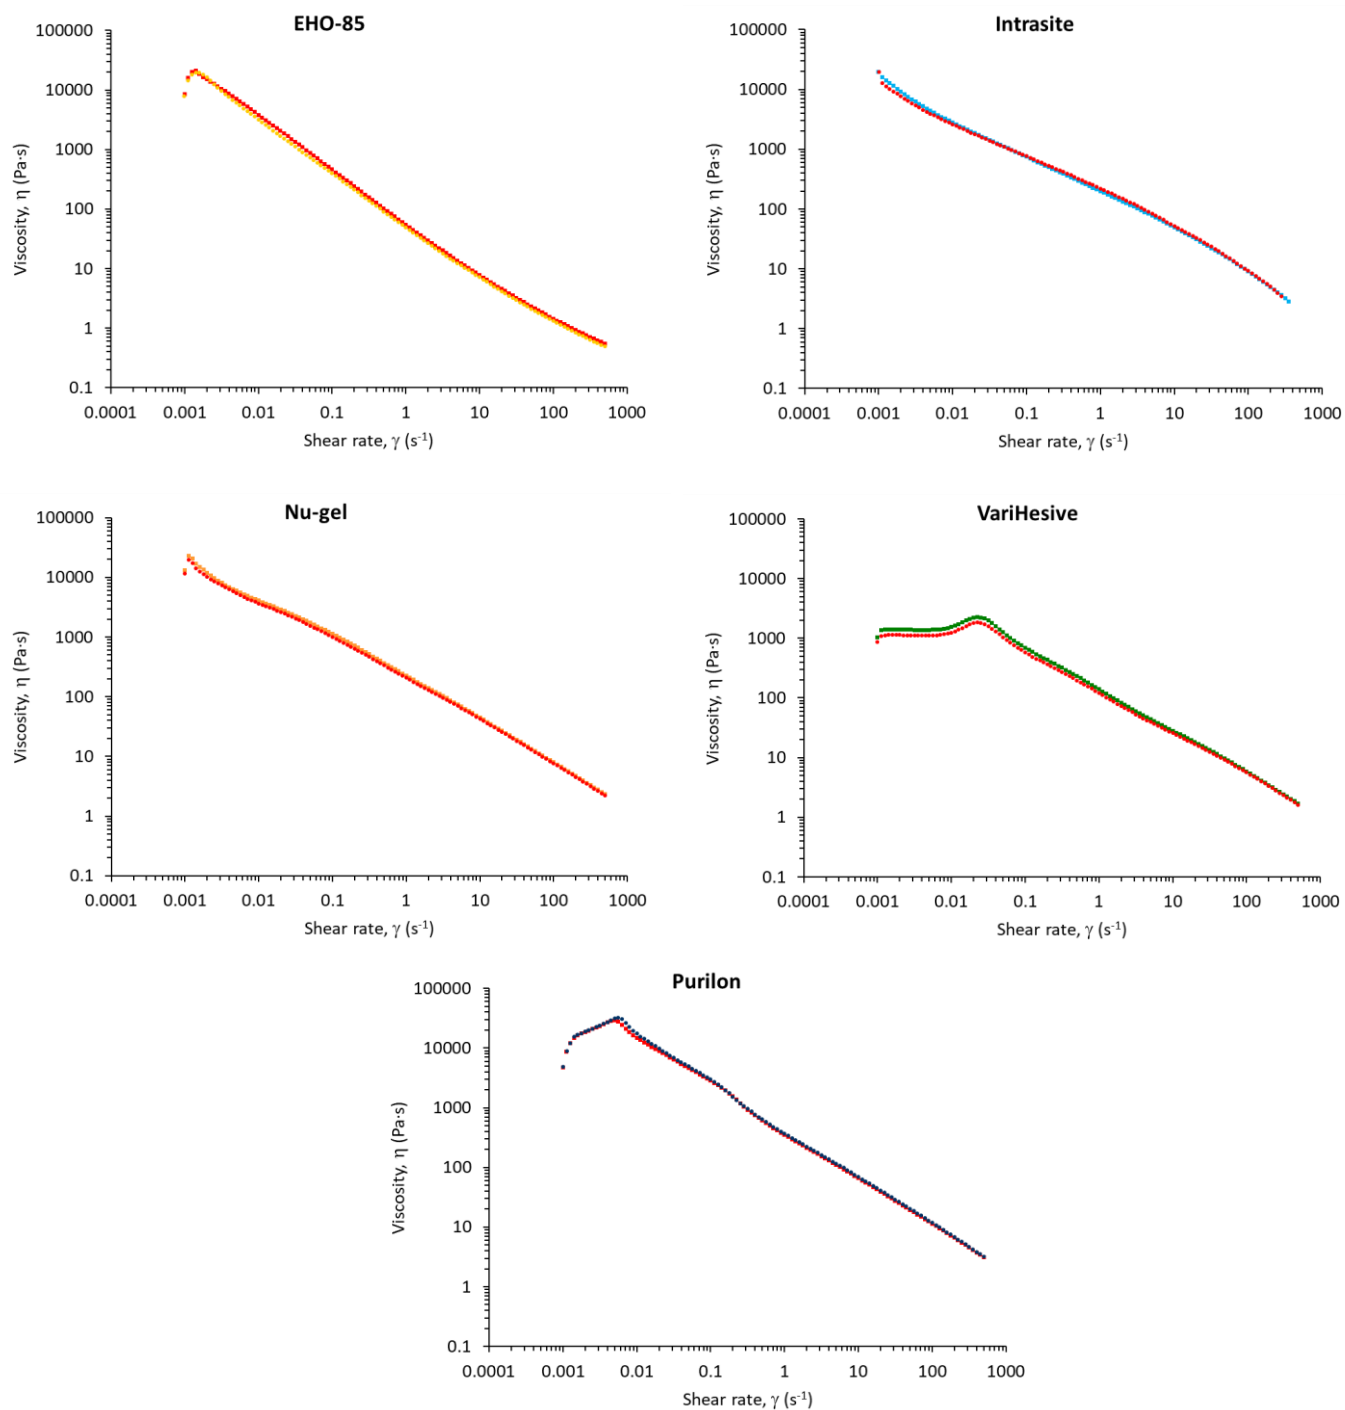

**Figure S1.** Flow curves, showing the viscosity as a function of shear rate (two replicates), for the five hydrogel samples (EHO-85, Intrasilite, Nu-gel, VariHesive and Purilon). The results of the two replicates are shown. The differences between replicates is small and the two curves overlap each other, confirming the reproducibility of these rheological determinations.

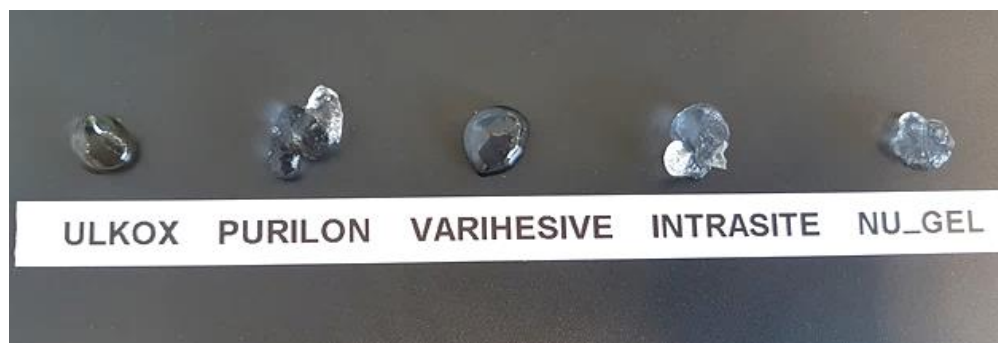

**Figure. S2. Visual aspect of the different gel samples** (EHO-85, Purilon, VariHesive, Intrasite and Nu-gel). The EHO-85 formulation was denoted as “UlkoX”. Samples were gently placed on a horizontal surface, allowed to rest for a few seconds and photographed from a vertical perspective. Then, the shear rate can be considered to be approximately zero. Intrasite and Nu-gel were quite stiff gels, while VariHesive appeared as the most fluid product. EHO-85 and Purilon seemed to have intermediate fluidity.

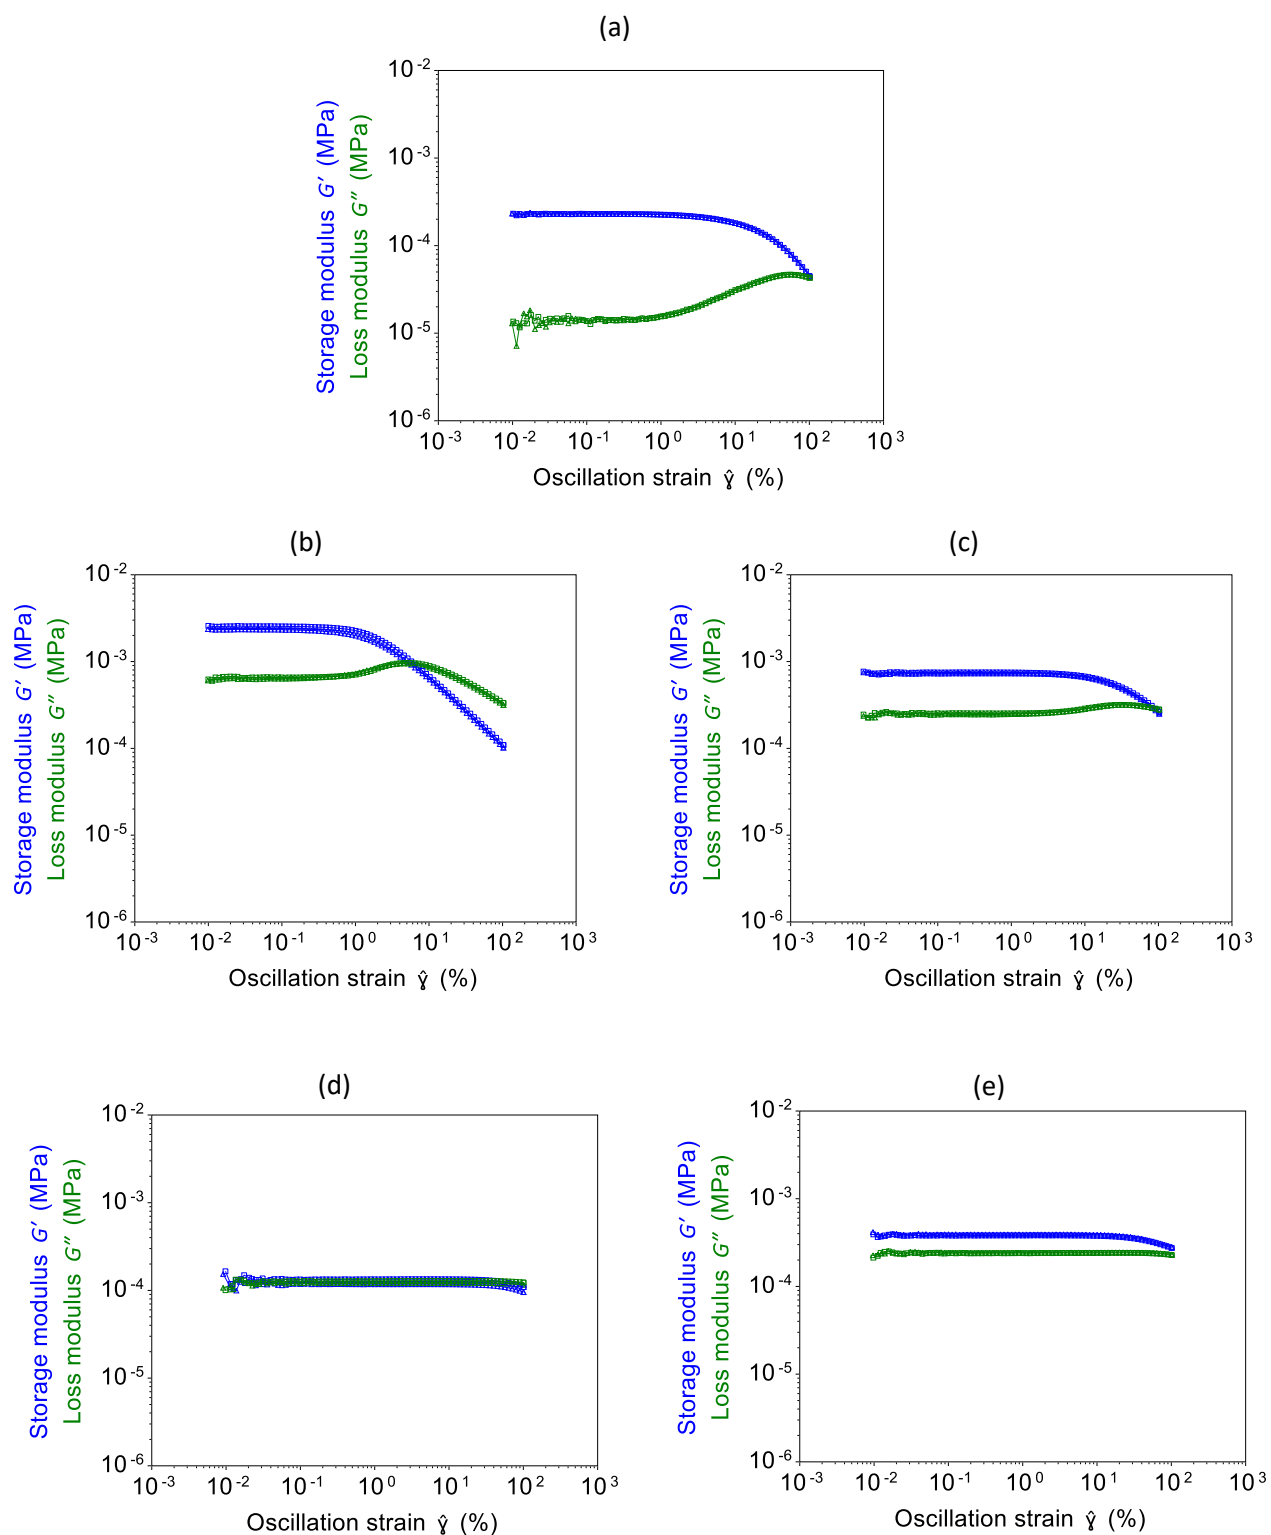

**Figure S3. Strain sweep of gel samples.** Plots show storage (elastic) modulus  $G'$  and loss (viscous) modulus  $G''$ , as a function of strain. (a) EHO-85, (b) Intracite, (c) Nu-gel, (d) VariHesive and (e) Purilon.

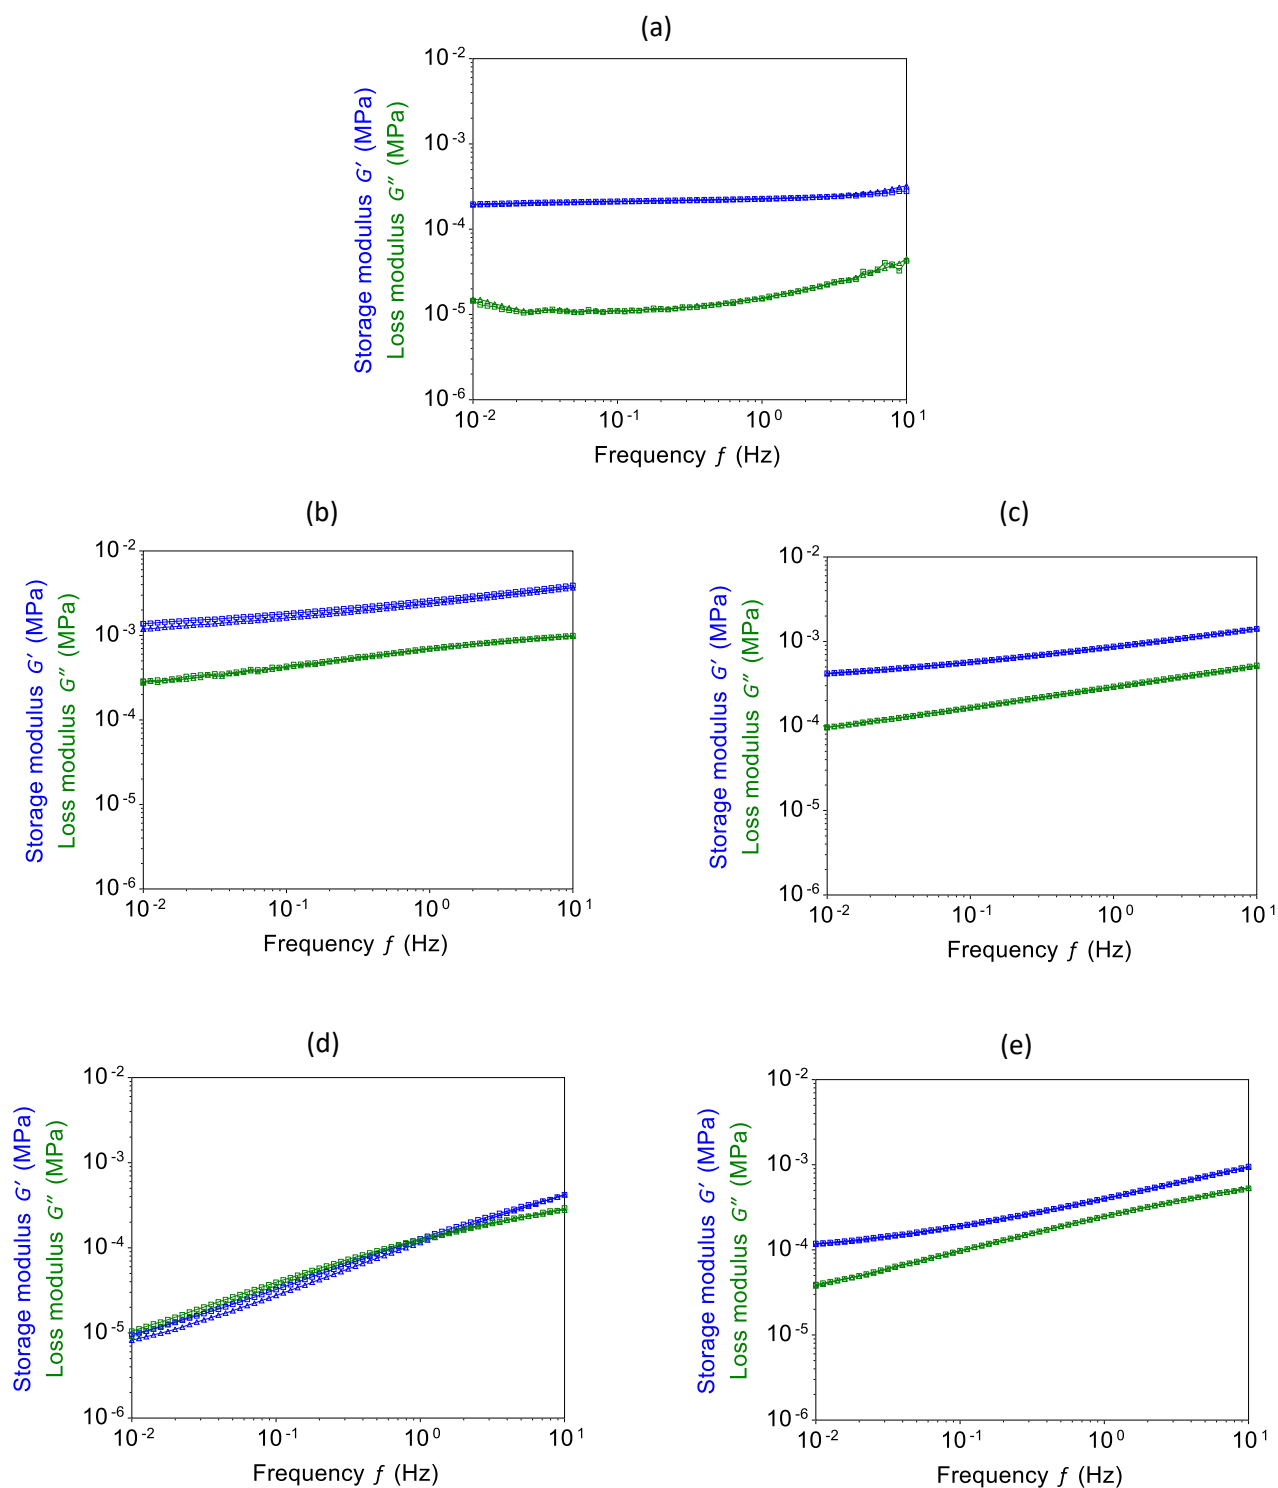

**Figure S4. Frequency sweep of gel samples.** Graphs show storage (elastic)  $G'$  and loss (viscous) modulus  $G''$ , as a function of frequency. (a) EHO-85, (b) Intrasilite, (c) Nu-gel, (d) VariHesive and (e) Purilon

**Table S1. Baseline characteristics of patients.** According to the planning of clinical investigation, only one ulcer per patient was treated. Only patients able to complete the questionnaire are shown.

| Characteristic                       | EHO-85 ( <i>n</i> = 103)<br>Mean $\pm$ SD or <i>n</i> (%) | VariHesive ( <i>n</i> = 92)<br>Mean $\pm$ SD or <i>n</i> (%) | <i>p</i> |
|--------------------------------------|-----------------------------------------------------------|--------------------------------------------------------------|----------|
| Sex, women                           | 70 (68.0%)                                                | 59 (64.1%)                                                   | 0.68     |
| Age, years                           | 78.0 $\pm$ 13.1                                           | 79.5 $\pm$ 14.8                                              | 0.18     |
| BMI, kg/m <sup>2</sup>               | 27.4 $\pm$ 6.0                                            | 28.8 $\pm$ 8.1                                               | 0.36     |
| Ankle/brachial index (ABI), VLU only | 1.0 $\pm$ 0.2                                             | 1.0 $\pm$ 0.2                                                | 0.98     |
| Diabetes mellitus                    | 41 (39.8%)                                                | 30 (32.6%)                                                   | 0.37     |
| Current smoker                       | 7 (6.8%)                                                  | 5 (5.4%)                                                     | 0.31     |
| Alcohol intake                       | 9 (8.7%)                                                  | 7 (7.6%)                                                     | 0.98     |
| Place of patient care                |                                                           |                                                              | 0.74     |
| Health center                        | 22 (21.4%)                                                | 24 (26.1%)                                                   |          |
| Own home                             | 52 (50.5%)                                                | 44 (47.8%)                                                   |          |
| Nursing center                       | 29 (28.1%)                                                | 24 (26.1%)                                                   |          |
| Autonomy level                       |                                                           |                                                              | 0.18     |

| Characteristic                          | EHO-85 ( <i>n</i> = 103)<br>Mean ±SD or <i>n</i> (%) | VariHesive ( <i>n</i> = 92)<br>Mean ±SD or <i>n</i> (%) | <i>p</i> |
|-----------------------------------------|------------------------------------------------------|---------------------------------------------------------|----------|
| Can walk easily                         | 22 (21.4%)                                           | 24 (26.1%)                                              |          |
| Some difficulty to walk                 | 45 (43.7%)                                           | 47 (51.1%)                                              |          |
| Unable to walk, bedridden               | 36 (34.9%)                                           | 21 (22.8%)                                              |          |
| <b>Blood test</b>                       |                                                      |                                                         |          |
| Serum albumin (3.40 to 5.0 g/dl)        | 3.7 ±0.5                                             | 3.5 ±0.5                                                | 0.13     |
| Creatinine clearance (80 to 120 ml/min) | 105.1 ±46.8                                          | 107.3 ±57.1                                             | 0.93     |

**Table S2. Description of ulcers and prior treatments.**

| Characteristic                                         | EHO-85 ( <i>n</i> = 103)<br>Mean $\pm$ SD or<br><i>n</i> (%) | VariHesive ( <i>n</i> = 92)<br>Mean $\pm$ SD or <i>n</i><br>(%) | <i>p</i> |
|--------------------------------------------------------|--------------------------------------------------------------|-----------------------------------------------------------------|----------|
| <b>Etiology</b>                                        |                                                              |                                                                 | 0.81     |
| Venous                                                 | 36 (34.9%)                                                   | 36 (39.1%)                                                      |          |
| Pressure                                               | 62 (60.2%)                                                   | 51 (55.4%)                                                      |          |
| <i>EPUAP II</i>                                        | 42 (67.7%)                                                   | 33 (64.7%)                                                      |          |
| <i>EPUAP III</i>                                       | 20 (32.3%)                                                   | 18 (35.3%)                                                      |          |
| Diabetic foot                                          | 5 (4.9%)                                                     | 5 (5.4%)                                                        |          |
| <i>Wagner I</i>                                        | 2 (40.0%)                                                    | 3 (60.0%)                                                       |          |
| <i>Wagner II</i>                                       | 3 (60.0%)                                                    | 2 (40.0%)                                                       |          |
| <b>Total number of ulcers per patient <sup>a</sup></b> |                                                              |                                                                 | 0.65     |
| 1                                                      | 68 (66.0%)                                                   | 55 (59.8%)                                                      |          |
| 2                                                      | 19 (18.5%)                                                   | 19 (20.6%)                                                      |          |
| $\geq 3$                                               | 16 (15.5%)                                                   | 18 (19.6%)                                                      |          |
| <b>Evolution time, months</b>                          | 7.1 $\pm$ 8.5                                                | 8.2 $\pm$ 9.4                                                   | 0.56     |
| <b>Duration, &gt;6 months</b>                          | 35 (34.0%)                                                   | 34 (37.0%)                                                      | 0.78     |
| <b>Wound area, cm<sup>2</sup></b>                      | 5.4 $\pm$ 9.0                                                | 3.4 $\pm$ 4.2                                                   | 0.45     |
| <b>Wound area, &gt;10 cm<sup>2</sup></b>               | 28 (27.2%)                                                   | 25 (27.2%)                                                      | 1.00     |
| <b>Granulation tissue, over total ulcer (%)</b>        | 71.0 $\pm$ 40.4                                              | 79.9 (35.6)                                                     | 0.14     |



| Characteristic                                        | EHO-85 ( <i>n</i> = 103)<br>Mean $\pm$ SD or<br><i>n</i> (%) | VariHesive ( <i>n</i> = 92)<br>Mean $\pm$ SD or <i>n</i><br>(%) | <i>p</i> |
|-------------------------------------------------------|--------------------------------------------------------------|-----------------------------------------------------------------|----------|
| <b>Exudate</b>                                        |                                                              |                                                                 | 0.82     |
| None                                                  | 14 (13.6%)                                                   | 9 (9.8%)                                                        |          |
| Low                                                   | 47 (45.6%)                                                   | 45 (48.9%)                                                      |          |
| Intermediate                                          | 36 (35.0%)                                                   | 34 (37.0%)                                                      |          |
| High                                                  | 6 (5.8%)                                                     | 4 (4.3%)                                                        |          |
| <b>Recurrent ulcer</b>                                | 35 (34.0%)                                                   | 31 (33.7%)                                                      | 1.00     |
| <b>Previous hospitalizations due to treated ulcer</b> | 9 (8.7%)                                                     | 3 (3.3%)                                                        | 0.20     |
| <b>Ulcer pain</b>                                     |                                                              |                                                                 | 0.77     |
| No pain nor discomfort                                | 16 (28.6%)                                                   | 14 (28.6%)                                                      |          |
| Slight pain or discomfort                             | 17 (30.4%)                                                   | 19 (38.8%)                                                      |          |
| Moderate pain or discomfort                           | 19 (33.9%)                                                   | 15 (30.6%)                                                      |          |
| Intense pain or discomfort                            | 4 (7.1%)                                                     | 1 (2.0%)                                                        |          |
| Extreme pain or discomfort                            | 0 (0.0%)                                                     | 0 (0.0%)                                                        |          |
| <b>Cures during previous month</b>                    |                                                              |                                                                 | 0.75     |
| Cure in dry environment                               | 16 (15.5%)                                                   | 16 (17.4%)                                                      |          |
| Cure in moist environment                             | 82 (79.6%)                                                   | 74 (80.4%)                                                      |          |
| Both                                                  | 2 (1.9%)                                                     | 0 (0.0%)                                                        |          |

| Characteristic                                               | EHO-85 ( <i>n</i> = 103)<br>Mean $\pm$ SD or<br><i>n</i> (%) | VariHesive ( <i>n</i> = 92)<br>Mean $\pm$ SD or <i>n</i><br>(%) | <i>p</i> |
|--------------------------------------------------------------|--------------------------------------------------------------|-----------------------------------------------------------------|----------|
| Unknown                                                      | 3 (2.9%)                                                     | 2 (2.2%)                                                        |          |
| <b>Debridement in last month</b>                             | 45 (43.7%)                                                   | 39 (42.4%)                                                      | 0.97     |
| <b>Sharp/surgical debridement, 24 to 72 h before visit 1</b> | 9 (8.7%)                                                     | 16 (17.4%)                                                      | 0.11     |

**Table S3. List of collaborating nurses (sub-investigators) by centers**

| Clinical Trial Centers and Principal Investigator                               | Nurse researchers                     | Health-center and nursing-centers |
|---------------------------------------------------------------------------------|---------------------------------------|-----------------------------------|
| <b>Centro Salud Aeropuerto</b><br>Concepción Mansilla Pedregosa (PI)            | Alberto Garrido Arroyo                | Centro Salud Aeropuerto           |
|                                                                                 | Mercedes Garrido Aranda               | Centro Salud Aeropuerto           |
|                                                                                 | María José Ibáñez Fernández           | Centro Salud Aeropuerto           |
|                                                                                 | María José Millán Ayala               | Centro Salud Aeropuerto           |
|                                                                                 | Pilar Lucena Díaz                     | Centro Salud Aeropuerto           |
|                                                                                 | Dolores Lozano Mesas                  | Centro Salud Aeropuerto           |
|                                                                                 | Rosa M <sup>a</sup> Coronado Molina   | Centro Salud Aeropuerto           |
|                                                                                 | Rosa M <sup>a</sup> Martínez Guillén  | Centro Salud Aeropuerto           |
|                                                                                 | Aileen M <sup>a</sup> Serrano Ramón   | Centro Salud Aeropuerto           |
|                                                                                 | Gema M <sup>a</sup> Delis Carrión     | Centro Salud Aeropuerto           |
|                                                                                 | Aurora Alameda López                  | Centro Salud Aeropuerto           |
| <b>Centro Salud Castilla del Pino</b><br>Raquel M <sup>a</sup> López López (PI) | Amelia Sanjuan Espiñeira              | Centro Salud Castilla del Pino    |
|                                                                                 | Eulalia Navarro Juan                  | Centro Salud Castilla del Pino    |
|                                                                                 | Fernanda Casado Salinas               | Centro Salud Castilla del Pino    |
|                                                                                 | María Angeles Reinoso Araque          | Centro Salud Castilla del Pino    |
|                                                                                 | Alejandro Contreras Beato             | Centro Salud Castilla del Pino    |
|                                                                                 | Francisco Viana Miranda               | Centro Salud Castilla del Pino    |
|                                                                                 | Exiquio Murillo Sánchez               | Centro Salud Castilla del Pino    |
|                                                                                 | Isabel María Luque Huertas            | Centro Salud Castilla del Pino    |
|                                                                                 | Mónica Merlo Viso                     | Centro Salud Castilla del Pino    |
|                                                                                 | Pedro Andrés Galey Chica              | Consultorio La Marina - Figueroa  |
|                                                                                 | Francisco José Vidal Maestre          | Residencia Vitalia - San Rafael   |
|                                                                                 | Natalia Acosta Ceballos               | Residencia Vitalia - San Rafael   |
|                                                                                 | Marta Izquierdo Prados                | Residencia Vitalia - San Rafael   |
|                                                                                 | María Reyes Bravo                     | Residencia Vitalia - San Rafael   |
|                                                                                 | Carmen Burg Gómez de Mercado          | Residencia FEPAMIC                |
|                                                                                 | María Inmaculada González Muñoz       | Residencia FEPAMIC                |
|                                                                                 | Ana María Pérez de la Lastra Zamorano | Residencia FEPAMIC                |
|                                                                                 | Tamara Albañil Frías                  | Residencia FEPAMIC                |
|                                                                                 | Ana María Crespo Clavellina           | Residencia FEPAMIC                |
|                                                                                 | Dr. Jose María Jiménez Páez           | Residencia Figueroa               |
|                                                                                 | María Dolores Salamanca Bautista      | Residencia Figueroa               |
| <b>Centro Salud Centro de Córdoba</b><br>Juan Antonio Rodríguez Salamanca (PI)  | Lourdes García Vázquez                | Centro Salud Centro de Córdoba    |
|                                                                                 | Gema Ordóñez Romero                   | Centro Salud Centro de Córdoba    |
|                                                                                 | Juana Valle Campos                    | Centro Salud Centro de Córdoba    |
|                                                                                 | Gloria Martínez Galera                | Centro Salud Centro de Córdoba    |
|                                                                                 | Inmaculada Ruiz Prieto                | Centro Salud Centro de Córdoba    |
|                                                                                 | Cristina Gil Muñoz                    | Centro Salud Centro de Córdoba    |
|                                                                                 | Inmaculada García Gómez               | Centro Salud Centro de Córdoba    |
|                                                                                 | Estefanía Montiel García              | Centro Salud Centro de Córdoba    |
|                                                                                 | Inmaculada López Barranco             | Centro Salud Centro de Córdoba    |
|                                                                                 | Cristina Varo Cadenas                 | Residencia Virgen de los Dolores  |
| <b>Centro Salud Fuensanta</b><br>Antonia Dominguez Ramírez (PI)                 | Amalia Pastrana Sánchez Crespo        | Centro Salud Fuensanta            |
|                                                                                 | María Jose Muñoz Urbano               | Centro Salud Fuensanta            |
|                                                                                 | Inmaculada Algar Algar                | Centro Salud Fuensanta            |
|                                                                                 | María Elena Fernández Díaz            | Centro Salud Fuensanta            |
|                                                                                 | Nieves Díaz Sedano                    | Centro Salud Fuensanta            |
|                                                                                 | Jose Fernando Cejas Delgado           | Centro Salud Fuensanta            |
|                                                                                 | Elena Ponferrada León                 | Centro Salud Fuensanta            |
|                                                                                 | María Jesus Jiménez Canales           | Centro Salud Fuensanta            |
|                                                                                 | Carmen Sánchez Pérez                  | Consultorio Los Angeles (Alcolea) |
|                                                                                 | Jesús Vicente Murcia Martínez         | Residencia El Yate (Alcolea)      |
| <b>Centro Salud Guadalquivir</b><br>Feliciano Santos Blanco (PI)                | María del Carmen Heredia Lozano       | Centro Salud Guadalquivir         |
|                                                                                 | Carmen Miras García                   | Centro Salud Guadalquivir         |
|                                                                                 | Yolanda Sánchez Palomo                | Centro Salud Guadalquivir         |
|                                                                                 | Gloria Navarro Luque                  | Centro Salud Guadalquivir         |
|                                                                                 | Carmen Márquez Córdoba                | Centro Salud Guadalquivir         |
|                                                                                 | Rosa María Troyano Pérez              | Centro Salud Guadalquivir         |

| Clinical Trial Centers and Principal Investigator | Nurse researchers                         | Health-center and nursing-centers |
|---------------------------------------------------|-------------------------------------------|-----------------------------------|
| <b>Centro Salud Huerta de la Reina</b>            | Jose Juan Garés Laguna                    | Centro Salud Huerta de la Reina   |
| Francisca Cuevas Pareja (PI)                      | Adoración Muñoz Alonso                    | Centro Salud Huerta de la Reina   |
|                                                   | Fernanda Moreno Vargas                    | Centro Salud Huerta de la Reina   |
|                                                   | Ana Belén Castellano Cano                 | Centro Salud Huerta de la Reina   |
|                                                   | María Antonia Salcines Muñoz              | Centro Salud Huerta de la Reina   |
|                                                   | Francisco Escribano Villanueva            | Centro Salud Huerta de la Reina   |
|                                                   | Francisca Tocado Narganes                 | Centro Salud Huerta de la Reina   |
| <b>Centro Salud Levante Sur</b>                   | <i>Juana Pérez Valero</i>                 | Centro Salud Levante Sur          |
| <i>María Muro Guerrero (PI)</i>                   | <i>Teresa Rubio Berlanga</i>              | Centro Salud Levante Sur          |
|                                                   | <i>Margarita Madrid Querol</i>            | Centro Salud Levante Sur          |
|                                                   | <i>Eva Maria Luque Marin</i>              | Centro Salud Levante Sur          |
|                                                   | <i>Francisco Manuel Jurado Rojo</i>       | Centro Salud Levante Sur          |
|                                                   | <i>Rafaela Simoni Pedrera</i>             | Centro Salud Levante Sur          |
|                                                   | <i>Matilde Membrillo Fuentes</i>          | Centro Salud Levante Sur          |
|                                                   | <i>Antonio García Ocaña</i>               | Centro Salud Levante Sur          |
|                                                   | Francisco López Torres                    | Centro Salud Levante Sur          |
|                                                   | <i>Montserrat Encuentra Lerma</i>         | Centro Salud Levante Sur          |
|                                                   | Lidia Gutiérrez Sánchez                   | Centro Salud Levante Sur          |
|                                                   | Aurora Servanda Martínez Pérez            | Centro Salud Levante Sur          |
|                                                   | Brígida Jurado Galván                     | Centro Salud Levante Sur          |
| <b>Centro Salud Levante Norte</b>                 | Carmen Canales Salguero                   | Centro Salud Levante-Norte        |
| Antonia Carmona Priego (PI)                       | Manuel Toledano Estepa                    | Centro Salud Levante-Norte        |
|                                                   | Carmen María Fuentes Madrid               | Centro Salud Levante-Norte        |
|                                                   | Antonio Emilio Martínez Más               | Centro Salud Levante-Norte        |
|                                                   | Pilar Ortiz Morales                       | Centro Salud Levante-Norte        |
|                                                   | María Dolores Rubio González              | Centro Salud Levante-Norte        |
|                                                   | Sacramento Rosel Castro                   | Centro Salud Levante-Norte        |
|                                                   | Carmen María Rodríguez Garriguet          | Centro Salud Levante-Norte        |
|                                                   | Carmen Albalá                             | Centro Salud Levante-Norte        |
|                                                   | Belén Jiménez Holgado                     | Centro Salud Levante-Norte        |
| <b>Centro Salud Lucano</b>                        | M <sup>a</sup> Angeles Rodríguez Castillo | Centro Salud Lucano               |
| Antonio González Delgado (PI)                     | Antonia Becerra Fernandez                 | Centro Salud Lucano               |
|                                                   | Jose Manuel Fernández Granados            | Centro Salud Lucano               |
|                                                   | Manuela Hidalgo Morillo                   | Centro Salud Lucano               |
|                                                   | Antonio Jesús Cecilla Moral               | Residencia Santísima Trinidad     |
|                                                   | Matilde Cano Merlo                        | Residencia Santísima Trinidad     |
| <b>Centro Salud Occidente</b>                     | Manuela Urbano Priego                     | Centro Salud Occidente            |
| Caridad Dios Guerra (C)                           | María Dolores López Espejo                | Centro Salud Occidente            |
|                                                   | Rosalía Serrano Berni                     | Centro Salud Occidente            |
|                                                   | María Azahara García Bono                 | Centro Salud Occidente            |
|                                                   | Carmen Fernández Gutierrez                | Consultorio El Higerón            |
|                                                   | María Salud Nieto González                | Consultorio El Higerón            |
|                                                   | Rosario Dios Guerra                       | Consultorio Villarrubia           |
| <b>Centro Salud Poniente</b>                      | Magdalena García Carrasco                 | Centro Salud Poniente             |
| M <sup>a</sup> Dolores Marín Alfaro (PI)          | Manuel Moreno Rodríguez                   | Centro Salud Poniente             |
|                                                   | Inmaculada Guzmán Castilla                | Centro Salud Poniente             |
|                                                   | Araceli Alcaide Guirao                    | Centro Salud Poniente             |
|                                                   | Teresa Martinez de la Torre               | Centro Salud Poniente             |
|                                                   | Luis Heredia Borrego                      | Centro Salud Poniente             |
|                                                   | Rosell de la Oliva Ramírez                | Centro Salud Poniente             |
|                                                   | Sergio Garrido Bollo                      | Centro Salud Poniente             |
|                                                   | Jorge Rafael Padilla Maestre              | Centro Salud Poniente             |
|                                                   | Palmira I. Gallego Huertas                | Centro Salud Poniente             |
| <b>Centro Salud Santa Rosa</b>                    | Angela María González García              | Centro Salud Santa Rosa           |
| Santiago Cruz Velarde (PI)                        | Federico Urbano Ramirez                   | Centro Salud Santa Rosa           |
|                                                   | Milagrosa Aguilar Villalba                | Centro Salud Santa Rosa           |
|                                                   | M <sup>a</sup> Carmen Luna Poyato         | Centro Salud Santa Rosa           |
|                                                   | Sonia Calero Juárez                       | Centro Salud Santa Rosa           |
|                                                   | Cristina López Olivares                   | Residencia ORPEA Centro           |
|                                                   | Ana Pozo Olivares                         | Residencia ORPEA Centro           |
|                                                   | Juan Jose García Zamudio                  | Residencia ORPEA Centro           |
|                                                   | Teresa Ruiz López                         | Residencia ORPEA Sierra           |
|                                                   | M <sup>a</sup> Encarnación Pulido Sanchez | Consultorio Bda. El Naranjo       |
|                                                   | Pilar Conde Moya                          | Consultorio Bda. El Naranjo       |

| Clinical Trial Centers and Principal Investigator                                 | Nurse researchers               | Health-center and nursing-centers        |
|-----------------------------------------------------------------------------------|---------------------------------|------------------------------------------|
| <b>Centro Salud Sector Sur (Santa Victoria)</b><br>José Tomás Linares García (PI) | Rosalía Espino Navarro          | Centro Salud Sector Sur (Santa Victoria) |
|                                                                                   | Ezequiel Jiménez Priego         | Centro Salud Sector Sur (Santa Victoria) |
|                                                                                   | Jose Antonio Santaella Alcaide  | Centro Salud Sector Sur (Santa Victoria) |
|                                                                                   | Inés Calvo Cabrera              | Centro Salud Sector Sur (Santa Victoria) |
|                                                                                   | Raquel López Valero             | Centro Salud Sector Sur (Santa Victoria) |
|                                                                                   | Ana Morgado Ramírez             | Centro Salud Sector Sur (Santa Victoria) |
| <b>Centro Salud Bujalance</b><br>Esteban Luis García Lara (PI)                    | Antonia Mohedo Caballero        | Centro Salud Bujalance                   |
|                                                                                   | Catalina Gómez Diaz             | Centro Salud Bujalance                   |
|                                                                                   | José Ramón Serrano González     | Centro Salud Bujalance                   |
|                                                                                   | Antonio Luna Mantas             | Consultorio Cañete de las Torres         |
|                                                                                   | Juan Antonio Quiros Blázquez    | Consultorio El Carpio                    |
|                                                                                   | Carmen López Jimenez            | Consultorio Villafranca de Córdoba       |
| <b>Centro Salud Montoro</b><br>Beatriz Alcalá Aguilera (PI)                       | Inmaculada Vega-Leal Bellido    | Centro Salud Montoro                     |
|                                                                                   | María José Luna Romero          | Centro Salud Montoro                     |
|                                                                                   | Araceli Carretero Gómez         | Centro Salud Montoro                     |
|                                                                                   | Amelia Camacho Buenosvinos      | Centro Salud Montoro                     |
|                                                                                   | Virgina González Pérez          | Centro Salud Montoro                     |
|                                                                                   | María del Mar Maya Cabrera      | Residencia Jesús Nazareno                |
|                                                                                   | María Dolores Baeza Cerro       | Residencia Jesús Nazareno                |
|                                                                                   | Isabel Sánchez Gálvez           | Residencia Jesús Nazareno                |
|                                                                                   | Pilar Mayorga Hortelano         | Residencia Jesús Nazareno                |
|                                                                                   | Joaquín Ruz Ramírez             | Consultorio Adamuz                       |
|                                                                                   | María del Pilar Jurado Rueda    | Consultorio Pedro Abad                   |
|                                                                                   | Mª Ángeles Delgado Uceda        | Consultorio Villa del Río                |
|                                                                                   | Cristina Gracia Rivera          | Consultorio Villa del Río                |
|                                                                                   | Dolores Ramirez Carmona         | Consultorio Villa del Río                |
| <b>Centro Salud Fuente Palmera</b><br>Marcial Caballero Arroyo (PI)               | Jesús Poyato Velasco            | Centro Salud Fuente Palmera              |
|                                                                                   | Maria del Valle Pavón Santacruz | Centro Salud Fuente Palmera              |
| <b>Centro Salud La Carlota</b><br>Aranzazu Sempere Gracia (PI)                    | Antonia Cuesta Plata            | Centro Salud La Carlota                  |
|                                                                                   | Enrique de la Cueva Montesinos  | Centro Salud La Carlota                  |
|                                                                                   | Rafael Campos López             | Centro Salud La Carlota                  |
|                                                                                   | Asunción Parias Salas           | Consultorio La Victoria                  |
| <b>Centro Salud Palma del Río</b><br>Dolores Lopera Marín (PI)                    | Margarita Aguilar Berastegui    | Centro Salud Palma del Río               |
|                                                                                   | MªAngeles Jimenez Sanchez       | Centro Salud Palma del Río               |
|                                                                                   | Rafael Molero De la Mata        | Centro Salud Palma del Río               |
|                                                                                   | Carlos Enrique Cabello Jaime    | Centro Salud Palma del Río               |
|                                                                                   | Eulalia Prieto Vilela           | Centro Salud Palma del Río               |
|                                                                                   | Alonso Guerra Milla             | Centro Salud Palma del Río               |
| <b>Centro Salud Posadas</b><br>Antonia Quero Vilchez (PI)                         | Ana María Molina Moreno         | Centro Salud Posadas                     |
|                                                                                   | Begoña González Vallin          | Centro Salud Posadas                     |
|                                                                                   | Eva Dorado Espinosa             | Centro Salud Posadas                     |
|                                                                                   | Victoria Migallón Sanchez       | Centro Salud Posadas                     |
|                                                                                   | Francisco Sánchez Guerrero      | Centro Salud Posadas                     |
|                                                                                   | Elena Gómez Moreno              | Centro Salud Posadas                     |
|                                                                                   | Raquel Bravo Martínez           | Consultorio Hornachuelos                 |
|                                                                                   | Isabel Luque Cantarero          | Residencia San Bernardo                  |
| <b>Centro Salud Montilla</b><br>María Dolores de la Cruz Hidalgo (PI)             | Mónica López Muriel             | Consultorio Los Mochos                   |
|                                                                                   | Eva María Romero Bonilla        | Centro Salud Montilla                    |
|                                                                                   | Juan Manuel Vilas Casado        | Centro Salud Montilla                    |
|                                                                                   | María Dolores Vilchez Gallegos  | Centro Salud Montilla                    |
|                                                                                   | María Luisa Clavero Berral      | Centro Salud Montilla                    |
|                                                                                   | Antonio Rodríguez Estepa        | Centro Salud Montilla                    |
|                                                                                   | Gonzalo Garramioza Robles       | Centro Salud Montilla                    |
|                                                                                   | Josefa Márquez Martínez         | Centro Salud Montilla                    |
|                                                                                   | Rosa María Salido Bellido       | Centro Salud Montilla                    |
|                                                                                   | Teresa Luque Llamas             | Centro Salud Montilla                    |
|                                                                                   | Isabel Mengual García           | Centro Salud Montilla                    |
|                                                                                   | Manuel Luque-Romero Sánchez     | Centro Salud Montilla                    |
|                                                                                   | Encarnación Luque Reyes         | Centro Salud Montilla                    |
|                                                                                   | María Felisa Luque Martínez     | Centro Salud Montilla                    |
|                                                                                   | Ana Isabel Calero García        | Centro Salud Montilla                    |

| Clinical Trial Centers and Principal Investigator      | Nurse researchers                    | Health-center and nursing-centers |
|--------------------------------------------------------|--------------------------------------|-----------------------------------|
| <b>Centro Salud Montilla (cont.)</b>                   | María José Pérez Pérez               | Centro Salud Montilla             |
| María Dolores de la Cruz Hidalgo (PI)                  | Marcos Bellido Sánchez               | Residencia San Juan de Dios       |
|                                                        | Verónica Galán Marín                 | Residencia San Juan de Dios       |
|                                                        | Carmen María Comino Montilla         | Residencia San Juan de Dios       |
|                                                        |                                      |                                   |
| <b>Centro Salud Lucena I y II</b>                      | Nicolasa García Gallardo             | Centro Salud Lucena               |
| Antonio José Rivas Ogalla (PI)                         | María Isabel Luna Corredera          | Centro Salud Lucena               |
|                                                        | Inmaculada Cañete Muñoz              | Centro Salud Lucena               |
|                                                        | María Luisa González Delgado         | Centro Salud Lucena               |
|                                                        | Inmaculada Jiménez Corredera         | Centro Salud Lucena               |
|                                                        | Juan B. Guerrero Muñoz               | Centro Salud Lucena               |
|                                                        | Antonio Martos Cárdenas              | Centro Salud Lucena               |
| <b>Centro Salud Cabra</b><br>Matilde Romero López (PI) | Purificación María Servian Rodríguez | Centro Salud Cabra                |
|                                                        | Leonardo Llado Salas                 | Centro Salud Cabra                |
|                                                        | Gertrudis Roldán Molina              | Centro Salud Cabra                |
|                                                        |                                      |                                   |
|                                                        | María Pilar Esteo Domínguez          | Centro Salud Cabra                |
|                                                        | María del Rosario Altés Comino       | Centro Salud Cabra                |
|                                                        | María Teresa Aguilar del Río         | Centro Salud Cabra                |
|                                                        | José Manuel Chacón Jiménez           | Centro Salud Cabra                |
|                                                        | María Ruz Ruiz                       | Centro Salud Cabra                |
|                                                        | María del Mar Moreno Ruiz            | Centro Salud Cabra                |
|                                                        | Juan Rabadán López                   | Centro Salud Cabra                |
|                                                        | Ana Ortiz Roldán                     | Residencia PROMI                  |
|                                                        | Mª Sierra Pérez Gallego              | Residencia PROMI                  |
|                                                        | María José Cubero Muñoz              | Consultorio Doña Mencía           |
|                                                        | Angeles Lopera Parraga               | Consultorio Nueva Carteya         |
|                                                        | Alba María Pérez-Vico Contreras      | Consultorio Nueva Carteya         |
|                                                        |                                      |                                   |
|                                                        |                                      |                                   |
|                                                        |                                      |                                   |
| <b>Centro Salud Fernan Nuñez</b>                       | Miguel García Jiménez                | Centro Salud Fernan Nuñez         |
| Isabel Alcaide Aguilar (PI)                            | Ana Arjona Martín                    | Centro Salud Fernan Nuñez         |
|                                                        | María Angeles Carmona López          | Centro Salud Fernan Nuñez         |
|                                                        | María Jesús Pérez Cobos              | Centro Salud Fernan Nuñez         |
|                                                        |                                      |                                   |

XXXXXXXXXXXXXXXXXX
